# Supplementary material for: Pb3(SeO3)Br4: a new nonlinear optical material with enhanced SHG response designedviaan ion-substitution strategy
Source: Royal Society of Chemistry journal article supplement (doi:10.1039/c7dt04443g), 2018-01-01
Supplement: c7dt04443g1.pdf [file c7dt04443g1.pdf]

## Electronic Supplementary Information

### **Pb<sub>3</sub>(SeO<sub>3</sub>)Br<sub>4</sub>: A New Nonlinear Optical Material with Enhanced SHG Response Designed via Ion Substitution Strategy**

Xiaoxiao Wang<sup>a</sup>, Xingxing Jiang<sup>b</sup>, Hongming Liu<sup>a</sup>, Lei Yang<sup>b</sup>, Zheshuai Lin<sup>\*.b</sup>, Zhanggui Hu<sup>b</sup>, Xianggao Meng<sup>c</sup>, Xingguo Chen<sup>\*a</sup>, Jingui Qin<sup>a</sup>

<sup>a</sup> Hubei Key Laboratory on Organic and Polymeric Opto-electronic Materials, College of Chemistry and Molecular Sciences, Wuhan University, Wuhan 430072, China. Email: xgchen@whu.edu.cn

<sup>b</sup> Beijing Center for Crystal R&D, Technical Institute of Physics and Chemistry, Chinese Academy of Sciences, Beijing 100190, China. Email: zslin@mail.ipc.ac.cn

<sup>c</sup> College of Chemistry, Central China Normal University, Wuhan 430079, China.

**Figure S1.** Simulated and measured powder X-ray diffraction patterns of Pb<sub>3</sub>(SeO<sub>3</sub>)Br<sub>4</sub>.

**Figure S2.** The EDX spectrum of Pb<sub>3</sub>(SeO<sub>3</sub>)Br<sub>4</sub> crystal.

**Figure S3.** The different bonding environments of three Pb atoms in Pb<sub>3</sub>(SeO<sub>3</sub>)Br<sub>4</sub>.

**Figure S4.** The comparison of the different Pb-O bond lengths around SeO<sub>3</sub><sup>2-</sup> group in Pb<sub>3</sub>(SeO<sub>3</sub>)Br<sub>4</sub> in this work and TeO<sub>3</sub><sup>2-</sup> group in Pb<sub>3</sub>(TeO<sub>3</sub>)Cl<sub>4</sub>.

**Figure S5.** IR and Raman spectra of Pb<sub>3</sub>(SeO<sub>3</sub>)Br<sub>4</sub>.

**Figure S6.** Oscilloscope traces of the SHG signals of KDP and Pb<sub>3</sub>(SeO<sub>3</sub>)Br<sub>4</sub> at the powder size of 200–300 μm.

**Figure S7.** The TGA curve of Pb<sub>3</sub>(SeO<sub>3</sub>)Br<sub>4</sub>.

**Figure. S8** The calculated refractive index of Pb<sub>3</sub>(SeO<sub>3</sub>)Br<sub>4</sub>.

**Table S1.** Selected bond lengths (Å) and calculated bond valences for Pb<sub>3</sub>(SeO<sub>3</sub>)Br<sub>4</sub>.

**Table S2.** Selected bond angles (°) for Pb<sub>3</sub>(SeO<sub>3</sub>)Br<sub>4</sub>.

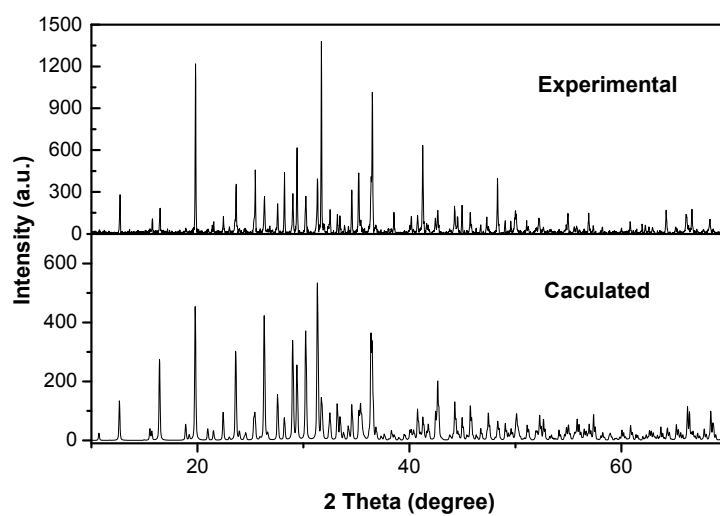

**Figure S1.** Simulated and measured powder X-ray diffraction patterns of  $\text{Pb}_3(\text{SeO}_3)\text{Br}_4$ .

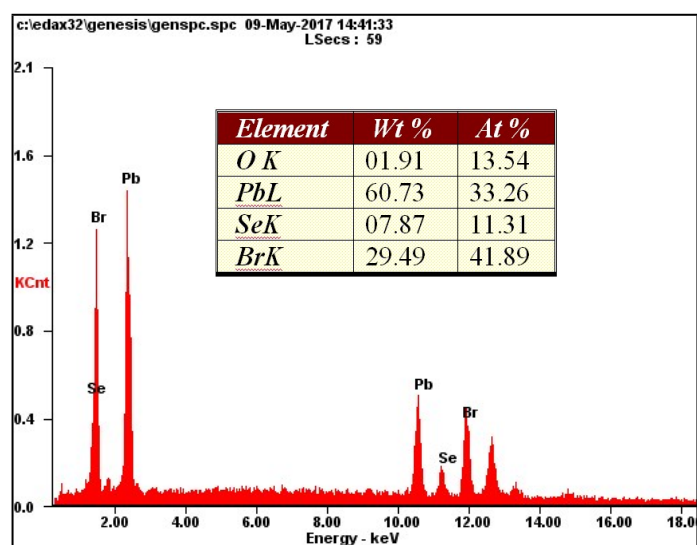

**Figure S2.** The EDX spectrum of  $\text{Pb}_3(\text{SeO}_3)\text{Br}_4$  crystal.

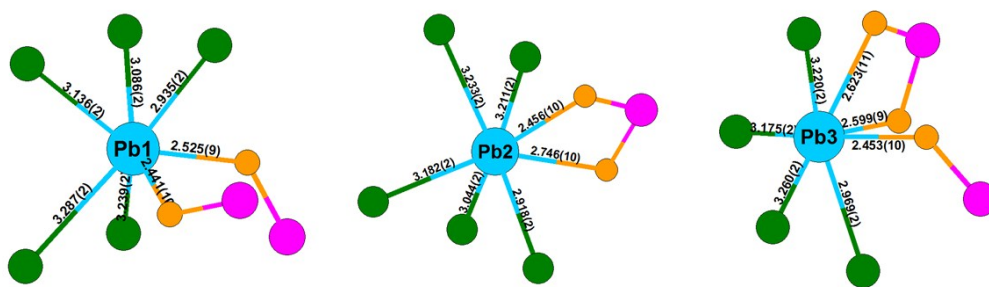

**Figure S3.** The different bonding environments of three Pb atoms in  $\text{Pb}_3(\text{SeO}_3)\text{Br}_4$

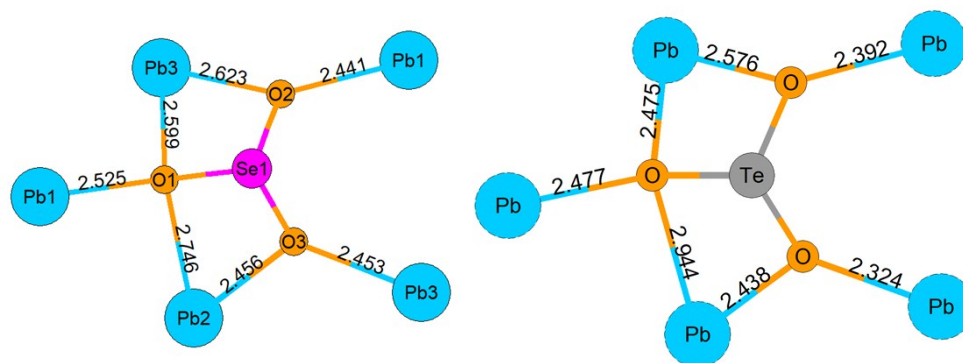

**Figure S4.** The comparison of the different Pb-O bond lengths around  $\text{SeO}_3^{2-}$  group in  $\text{Pb}_3(\text{SeO}_3)\text{Br}_4$  (in this work) and  $\text{TeO}_3^{2-}$  group in  $\text{Pb}_3(\text{TeO}_3)\text{Cl}_4$  (in ref. 1).

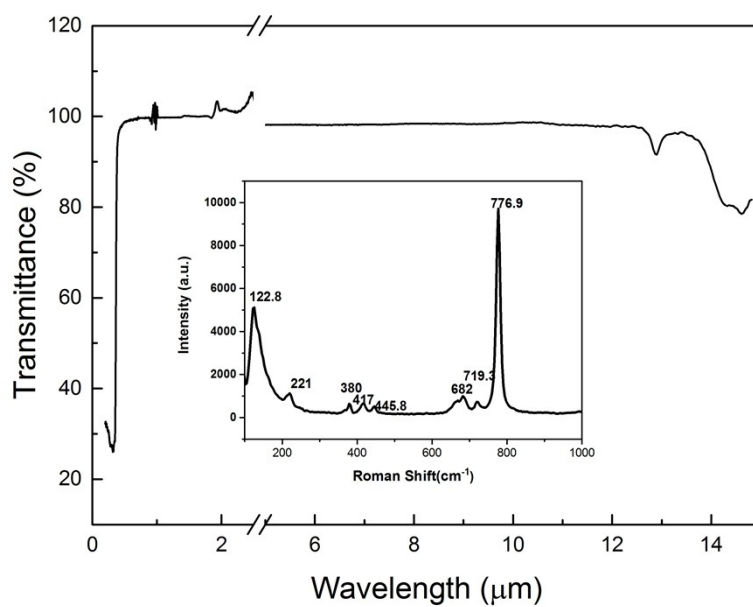

**Figure S5.** IR and Raman spectra of  $\text{Pb}_3(\text{SeO}_3)\text{Br}_4$ .

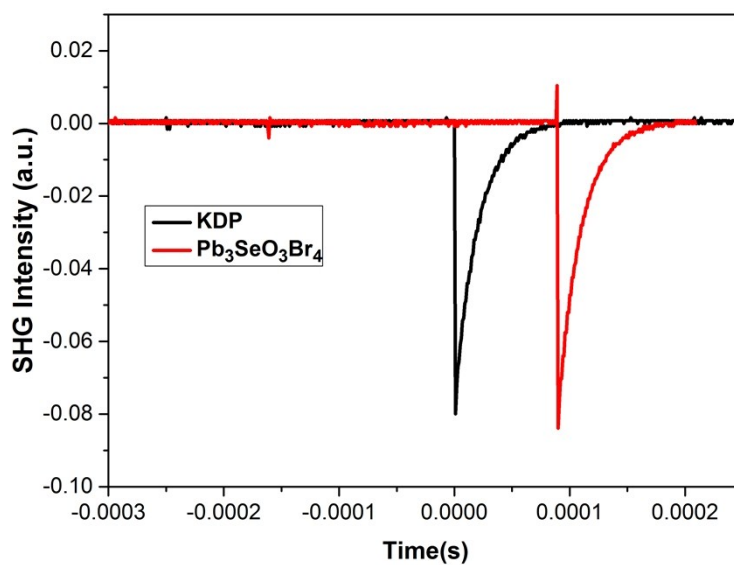

**Figure S6.** Oscilloscope traces of the SHG signals of KDP and  $\text{Pb}_3(\text{SeO}_3)\text{Br}_4$  at the powder size of 200–300  $\mu\text{m}$ .

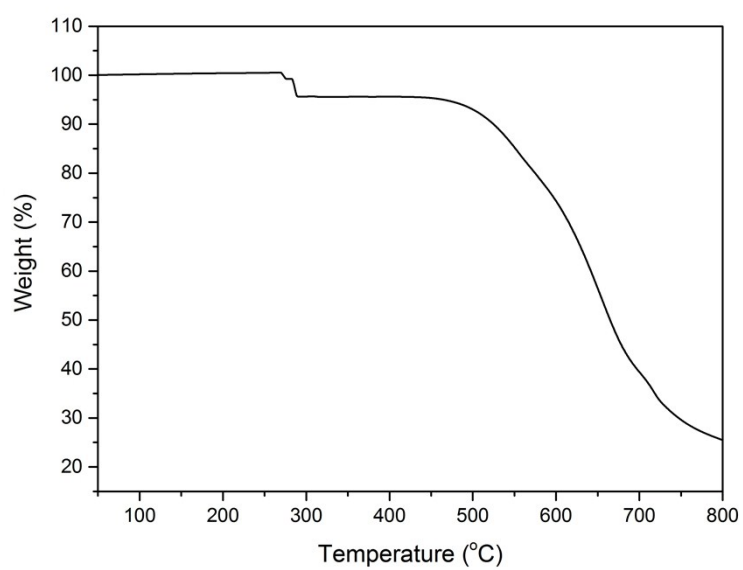

**Figure S7.** The TGA curve of  $\text{Pb}_3(\text{SeO}_3)\text{Br}_4$ .

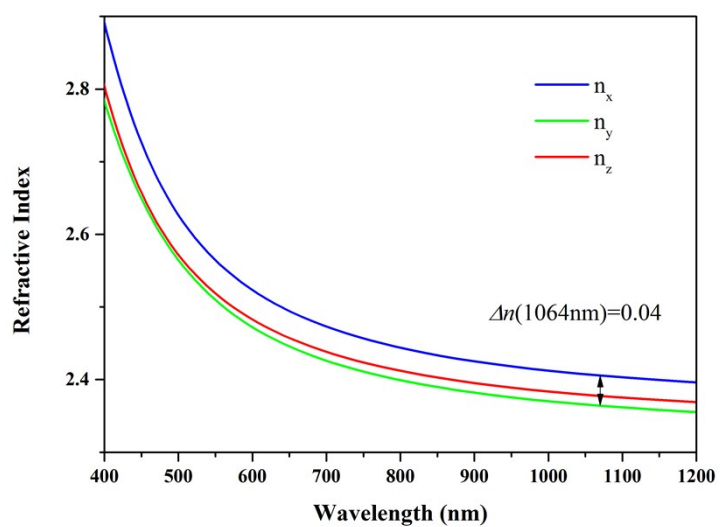

**Figure S8.** The calculated refractive index of  $\text{Pb}_3(\text{SeO}_3)\text{Br}_4$ .

**Table S1.** Selected bond lengths (Å) and calculated bond valences for Pb<sub>3</sub>(SeO<sub>3</sub>)Br<sub>4</sub>.

|               | bond length (Å) | bond valence |               | bond length (Å) | bond valence |
|---------------|-----------------|--------------|---------------|-----------------|--------------|
| Pb(1)-O(2)#1  | 2.441(10)       | 0.409        | Pb(2)-O(3)#5  | 2.457(10)       | 0.391        |
| Pb(1)-O(1)    | 2.525(10)       | 0.335        | Pb(2)-O(1)#5  | 2.747(10)       | 0.178        |
| Pb(1)-Br(3)   | 2.9354(18)      | 0.425        | Pb(2)-Br(1)#6 | 2.9185(19)      | 0.444        |
| Pb(1)-Br(4)#2 | 3.0863(17)      | 0.283        | Pb(2)-Br(4)#7 | 3.0463(17)      | 0.315        |
| Pb(1)-Br(2)   | 3.1360(17)      | 0.246        | Pb(2)-Br(2)   | 3.1827(17)      | 0.217        |
| Pb(3)-O(3)#3  | 2.453(10)       | 0.400        | Pb(2)-Br(4)   | 3.2114(18)      | 0.201        |
| Pb(3)-O(1)#4  | 2.599(9)        | 0.265        | Pb(2)-Br(2)#8 | 3.2322(17)      | 0.189        |
| Pb(3)-O(2)#4  | 2.623(11)       | 0.253        | Se(1)-O(3)    | 1.698(10)       | 1.361        |
| Pb(3)-Br(3)#4 | 2.9691(17)      | 0.388        | Se(1)-O(2)    | 1.701(11)       | 1.350        |
| Pb(3)-Br(1)   | 3.1754(18)      | 0.221        | Se(1)-O(1)    | 1.733(9)        | 1.213        |
| Pb(3)-Br(2)   | 3.2197(16)      | 0.196        |               |                 |              |

**Table S2.** Selected bond angles (°) for Pb<sub>3</sub>(SeO<sub>3</sub>)Br<sub>4</sub>.

|                        |           |                        |           |
|------------------------|-----------|------------------------|-----------|
| O(2)#1-Pb(1)-O(1)      | 90.8(4)   | O(2)#1-Pb(1)-Br(3)     | 80.3(3)   |
| O(1)-Pb(1)-Br(3)       | 77.3(2)   | O(2)#1-Pb(1)-Br(4)#2   | 159.4(3)  |
| O(1)-Pb(1)-Br(4)#2     | 80.9(2)   | Br(3)-Pb(1)-Br(4)#2    | 79.44(5)  |
| O(2)#1-Pb(1)-Br(2)     | 94.0(3)   | O(1)-Pb(1)-Br(2)       | 151.6(2)  |
| Br(3)-Pb(1)-Br(2)      | 75.91(4)  | Br(4)#2-Pb(1)-Br(2)    | 84.98(4)  |
| O(2)#1-Pb(1)-Br(4)#3   | 115.3(3)  | O(1)-Pb(1)-Br(4)#3     | 68.1(2)   |
| Br(3)-Pb(1)-Br(4)#3    | 141.61(5) | Br(4)#2-Pb(1)-Br(4)#3  | 79.13(2)  |
| Br(2)-Pb(1)-Br(4)#3    | 132.91(4) | O(3)#4-Pb(3)-O(1)#5    | 76.0(3)   |
| O(3)#4-Pb(3)-O(2)#5    | 71.2(3)   | O(1)#5-Pb(3)-O(2)#5    | 59.4(3)   |
| O(3)#4-Pb(3)-Br(3)#5   | 79.1(2)   | O(1)#5-Pb(3)-Br(3)#5   | 75.6(2)   |
| O(2)#5-Pb(3)-Br(3)#5   | 130.4(2)  | O(3)#4-Pb(3)-Br(1)     | 147.8(3)  |
| O(1)#5-Pb(3)-Br(1)     | 71.9(2)   | O(2)#5-Pb(3)-Br(1)     | 94.0(3)   |
| Br(3)#5-Pb(3)-Br(1)    | 90.70(5)  | O(3)#4-Pb(3)-Br(2)     | 76.6(2)   |
| O(1)#5-Pb(3)-Br(2)     | 123.6(2)  | O(2)#5-Pb(3)-Br(2)     | 65.4(2)   |
| Br(3)#5-Pb(3)-Br(2)    | 143.05(5) | Br(1)-Pb(3)-Br(2)      | 124.02(5) |
| O(3)#6-Pb(2)-O(1)#6    | 58.9(3)   | O(3)#6-Pb(2)-Br(1)#7   | 92.8(3)   |
| O(1)#6-Pb(2)-Br(1)#7   | 74.3(2)   | O(3)#6-Pb(2)-Br(4)#8   | 136.3(2)  |
| O(1)#6-Pb(2)-Br(4)#8   | 78.4(2)   | Br(1)#7-Pb(2)-Br(4)#8  | 83.19(5)  |
| O(3)#6-Pb(2)-Br(2)     | 135.8(2)  | O(1)#6-Pb(2)-Br(2)     | 151.4(2)  |
| Br(1)#7-Pb(2)-Br(2)    | 79.95(5)  | Br(4)#8-Pb(2)-Br(2)    | 86.51(4)  |
| O(3)#6-Pb(2)-Br(4)     | 75.1(3)   | O(1)#6-Pb(2)-Br(4)     | 66.3(2)   |
| Br(1)#7-Pb(2)-Br(4)    | 139.50(5) | Br(4)#8-Pb(2)-Br(4)    | 80.20(2)  |
| Br(2)-Pb(2)-Br(4)      | 134.96(4) | O(3)#6-Pb(2)-Br(2)#9   | 76.3(2)   |
| O(1)#6-Pb(2)-Br(2)#9   | 129.4(2)  | Br(1)#7-Pb(2)-Br(2)#9  | 133.83(5) |
| Br(4)#8-Pb(2)-Br(2)#9  | 134.70(5) | Br(2)-Pb(2)-Br(2)#9    | 78.04(2)  |
| Br(4)-Pb(2)-Br(2)#9    | 81.42(4)  | O(3)-Se(1)-O(2)        | 102.8(5)  |
| O(3)-Se(1)-O(1)        | 97.0(5)   | O(2)-Se(1)-O(1)        | 97.9(5)   |
| Pb(1)-Br(2)-Pb(2)      | 86.66(4)  | Pb(1)-Br(2)-Pb(3)      | 116.67(5) |
| Pb(2)-Br(2)-Pb(3)      | 122.28(5) | Pb(1)-Br(2)-Pb(2)#2    | 89.67(5)  |
| Pb(2)-Br(2)-Pb(2)#2    | 153.87(5) | Pb(3)-Br(2)-Pb(2)#2    | 82.27(4)  |
| Pb(2)#10-Br(4)-Pb(1)#9 | 84.84(4)  | Pb(2)#10-Br(4)-Pb(2)   | 152.84(6) |
| Pb(1)#9-Br(4)-Pb(2)    | 90.95(5)  | Pb(2)#10-Br(4)-Pb(1)#6 | 91.88(5)  |
| Pb(1)#9-Br(4)-Pb(1)#6  | 152.75(5) | Pb(2)-Br(4)-Pb(1)#6    | 79.73(4)  |
| Pb(1)-Br(3)-Pb(3)#11   | 91.80(5)  | Pb(2)#12-Br(1)-Pb(3)   | 96.49(5)  |
| Se(1)-O(1)-Pb(1)       | 128.8(5)  | Se(1)-O(1)-Pb(3)#11    | 101.3(4)  |
| Pb(1)-O(1)-Pb(3)#11    | 111.7(4)  | Se(1)-O(1)-Pb(2)#3     | 95.0(4)   |
| Pb(1)-O(1)-Pb(2)#3     | 103.2(3)  | Pb(3)#11-O(1)-Pb(2)#3  | 116.6(4)  |
| Se(1)-O(3)-Pb(3)#13    | 131.7(5)  | Se(1)-O(3)-Pb(2)#3     | 107.1(5)  |
| Pb(3)#13-O(3)-Pb(2)#3  | 119.6(4)  | Se(1)-O(2)-Pb(1)#14    | 127.5(5)  |
| Se(1)-O(2)-Pb(3)#11    | 101.3(4)  | Pb(1)#14-O(2)-Pb(3)#11 | 125.5(4)  |

## References

1. S. Y. Zhang, C. L. Hu, P. X. Li, H. L. Jiang, J. G. Mao, *Dalton. Trans.*, 2012, 41, 9532-9542.
